# Supplementary material for: Alcohol promoted N-methylation of anilines with CO2/H2 over a cobalt catalyst under mild conditions
Source: Royal Society of Chemistry journal article supplement (doi:10.1039/d1gc01049b), 2021-01-01
Supplement: d1gc01049b1.pdf [file d1gc01049b1.pdf]

## Supporting Information

# Alcohol Promoted N-methylation of Anilines with CO<sub>2</sub>/H<sub>2</sub> over Cobalt Catalyst under Mild Conditions

Zhengang Ke,<sup>a</sup> Yanfei Zhao<sup>a, b</sup>, Ruipeng Li<sup>a, b</sup>, Huan Wang<sup>a, b</sup>, Wei Zeng<sup>a, b</sup>, Minhao Tang<sup>a, b</sup>, Buxing Han<sup>a, b</sup>,  
and Zhimin Liu\*<sup>a, b</sup>

<sup>a</sup> Institute of Chemistry, Chinese Academy of Sciences, Beijing 100190, China

<sup>b</sup> University of Chinese Academy of Sciences, Beijing 100049, China.

E-mail: [liuzm@iccas.ac.cn](mailto:liuzm@iccas.ac.cn)

### Table of the contents

|                                                                                                                            |    |
|----------------------------------------------------------------------------------------------------------------------------|----|
| 1. Analysis of reported catalytic systems of N-methylation of N-methylaniline with CO <sub>2</sub> /H <sub>2</sub> . ..... | 2  |
| 2. Reaction conditions optimization.....                                                                                   | 3  |
| 3. The interaction of Sn(OTf) <sub>2</sub> and N-methyl formanilide. ....                                                  | 7  |
| 4. Mechanism investigation .....                                                                                           | 9  |
| 5. <sup>1</sup> H and <sup>13</sup> C NMR and HR-MS (ESI) data of products .....                                           | 12 |
| 6. <sup>1</sup> H and <sup>13</sup> C NMR spectra of products .....                                                        | 14 |
| 7. GC-MS spectra of products.....                                                                                          | 22 |
| 8. References .....                                                                                                        | 25 |

## 1. Analysis of reported catalytic systems of N-methylation of N-methylaniline with CO<sub>2</sub>/H<sub>2</sub>.

**Table S1.** Comparison of catalytic performance of Co(OAc)<sub>2</sub>·4H<sub>2</sub>O/triphos/Sn(OTf)<sub>2</sub> to reported catalytic systems for N-methylation of N-methylaniline with CO<sub>2</sub>/H<sub>2</sub>.

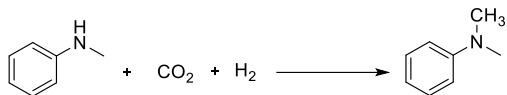

| Catalyst                                                 | Additive                       | Solvent  | CO <sub>2</sub> (MPa) | H <sub>2</sub> (MPa) | T (°C) | t (h) | Yield (%) | TON   | TOF   | Ref       |
|----------------------------------------------------------|--------------------------------|----------|-----------------------|----------------------|--------|-------|-----------|-------|-------|-----------|
| [Ru(triphos)(tmm)] (2.5 mol%)                            | HNTf <sub>2</sub> (5 mol%)     | THF      | 2                     | 6                    | 140    | 22    | 97        | 38.8  | 1.76  | [1]       |
| Ru(acac) <sub>3</sub> /triphos (1 mol%)                  | MSA (1.5 mol%)                 | THF      | 2                     | 6                    | 140    | 24    | 80        | 80    | 3.33  | [2]       |
| Pd/CuZrO <sub>x</sub> (0.75 mol%)                        | -                              | octane   | 1                     | 2.5                  | 150    | 30    | 71        | 94.7  | 3.16  | [3]       |
| Pt-MoO <sub>x</sub> /TiO <sub>2</sub> (2 mol%)           | -                              | none     | 1                     | 4                    | 200    | 24    | 85        | 42.5  | 1.77  | [4]       |
| CuAlO <sub>x</sub> (44 mol%)                             | -                              | hexane   | 3                     | 7                    | 160    | 24    | 86        | 1.95  | 0.08  | [5]       |
| Au/Al <sub>2</sub> O <sub>3</sub> (0.5 mol%)             | -                              | hexane   | 2                     | 6                    | 140    | 7     | 96        | 192   | 27.43 | [6]       |
| Re/TiO <sub>2</sub> (2 mol%)                             | -                              | dodecane | 1                     | 5                    | 200    | 24    | 98        | 49    | 2.04  | [7]       |
| Cu/CeO <sub>2</sub> (3.9 mol%)                           | -                              | toluene  | 1                     | 7                    | 150    | 4     | 2.5       | 0.64  | 0.16  | [8]       |
| Pd-ZnO/TiO <sub>2</sub> (2.8 mol%)                       | -                              | toluene  | 1.5                   | 4.5                  | 180    | 24    | 87        | 31.07 | 1.29  | [9]       |
| Co(OAc) <sub>2</sub> ·4H <sub>2</sub> O/triphos (5 mol%) | Sn(OTf) <sub>2</sub> (30 mol%) | EtOH     | 2                     | 7                    | 125    | 24    | 82        | 16.4  | 0.68  | This work |

## 2. Reaction conditions optimization

**Table S2.** Optimization of cobalt salts

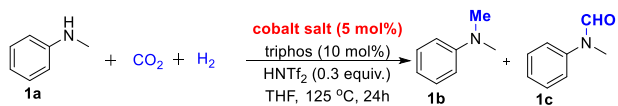

| Entry          | Cobalt salt                                           | Yield of <b>1b</b> (%) | Yield of <b>1c</b> (%) |
|----------------|-------------------------------------------------------|------------------------|------------------------|
| 1              | -                                                     | <1                     | <1                     |
| 2 <sup>b</sup> | Co(OAc) <sub>2</sub> ·4H <sub>2</sub> O               | <1                     | <1                     |
| 3              | CoF <sub>3</sub>                                      | 1                      | <1                     |
| 4              | Co(acac) <sub>3</sub>                                 | 35                     | <1                     |
| 5              | K <sub>3</sub> [Co(CN) <sub>6</sub> ]                 | <1                     | <1                     |
| 6              | CoF <sub>2</sub>                                      | 2                      | 2                      |
| 7              | Co(ClO <sub>4</sub> ) <sub>2</sub> ·6H <sub>2</sub> O | 3                      | <1                     |
| 8              | Co(BF <sub>4</sub> ) <sub>2</sub> ·6H <sub>2</sub> O  | 19                     | <1                     |
| 9              | Co(acac) <sub>2</sub> ·2H <sub>2</sub> O              | 20                     | <1                     |
| 10             | Co(OAc) <sub>2</sub> ·4H <sub>2</sub> O               | 52                     | <1                     |

Reaction condition: N-methylaniline (**1a**) (1.0 mmol), cobalt salt (5 mol %), triphos (10 mol %), HNTf<sub>2</sub> (0.3 equiv.), THF (2 mL), CO<sub>2</sub> (2.0 MPa), H<sub>2</sub> (7.0 MPa), 125 °C, 24 h. The yield of products was determined by GC, calibrated using *n*-dodecane as the internal standard. <sup>b</sup> no triphos.

**Table S3.** Optimization of solvents

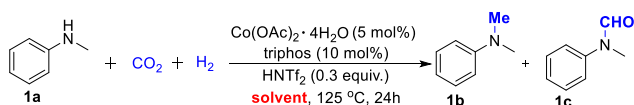

| Entry | Solvent            | Yield of <b>1b</b> (%) | Yield of <b>1c</b> (%) |
|-------|--------------------|------------------------|------------------------|
| 1     | <i>n</i> -heptane  | 12                     | <1                     |
| 2     | toluene            | 19                     | <1                     |
| 3     | 1,4-dioxane        | 49                     | <1                     |
| 4     | EtOH               | 70                     | 2                      |
| 5     | THF                | 52                     | <1                     |
| 6     | CH <sub>3</sub> CN | 2                      | <1                     |
| 7     | DMF                | 19                     | 10                     |

Reaction condition: **1a** (1.0 mmol), Co(OAc)<sub>2</sub>·4H<sub>2</sub>O (5 mol %), triphos (10 mol %), HNTf<sub>2</sub> (0.3 equiv.), solvent (2 mL), CO<sub>2</sub> (2.0 MPa), H<sub>2</sub> (7.0 MPa), 125 °C, 24 h. The yield of products was determined by GC, calibrated using *n*-dodecane as the internal standard.

**Table S4.** Optimization of additive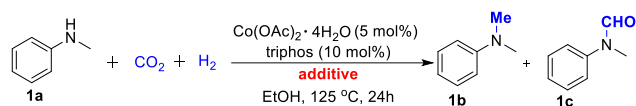

| Entry | Additive (equiv.)                   | Yield of <b>1b</b> (%) | Yield of <b>1c</b> (%) |
|-------|-------------------------------------|------------------------|------------------------|
| 1     | -                                   | <1                     | <1                     |
| 2     | MSA/0.3                             | 6                      | 3                      |
| 3     | TMA/0.3                             | 58                     | 3                      |
| 4     | HNTf <sub>2</sub> /0.3              | 70                     | 2                      |
| 5     | Al(OTf) <sub>2</sub> /0.3           | 68                     | <1                     |
| 6     | Yb(OTf) <sub>2</sub> /0.3           | 76                     | <1                     |
| 7     | Sn(OTf) <sub>2</sub> /0.3           | 82                     | 1                      |
| 8     | K <sub>2</sub> CO <sub>3</sub> /0.3 | <1                     | <1                     |
| 9     | Sn(OTf) <sub>2</sub> /0.1           | 37                     | <1                     |
| 10    | Sn(OTf) <sub>2</sub> /0.2           | 70                     | 5                      |
| 11    | Sn(OTf) <sub>2</sub> /0.4           | 75                     | <1                     |
| 13    | Sn(OTf) <sub>2</sub> /0.5           | 67                     | <1                     |
| 14    | Sn(OTf) <sub>2</sub> /0.7           | 50                     | <1                     |

Reaction condition: **1a** (1.0 mmol),  $\text{Co}(\text{OAc})_2 \cdot 4\text{H}_2\text{O}$  (10 mol %), triphos (10 mol %), additive, EtOH (2.0 mL),  $\text{CO}_2$  (2.0 MPa),  $\text{H}_2$  (7.0 MPa), 125 °C, 24 h. The yield of products was determined by GC, calibrated using *n*-dodecane as the internal standard.

**Table S5.** Optimization of pressure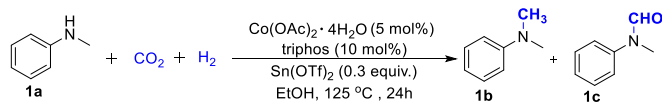

| Entry | $\text{CO}_2$ (MPa) | $\text{H}_2$ (MPa) | Yield of <b>1b</b> (%) | Yield of <b>1c</b> (%) |
|-------|---------------------|--------------------|------------------------|------------------------|
| 1     | 2                   | 7                  | 82                     | 1                      |
| 2     | 1                   | 7                  | 40                     | <1                     |
| 3     | 2                   | 3                  | 50                     | 3                      |

Reaction condition: **1a** (1.0 mmol),  $\text{Co}(\text{OAc})_2 \cdot 4\text{H}_2\text{O}$  (10 mol %), triphos (10 mol %),  $\text{Sn}(\text{OTf})_2$  (0.3 equiv.), EtOH (2.0 mL),  $\text{CO}_2$ ,  $\text{H}_2$ , 125 °C, 24 h. The yield of products was determined by GC, calibrated using *n*-dodecane as the internal standard.

**Table S6.** Optimization of reaction temperature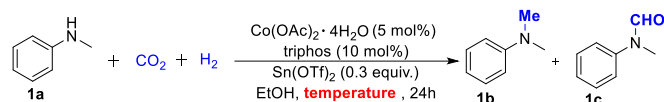

| Entry | temperature (°C) | Yield of <b>1b</b> (%) | Yield of <b>1c</b> (%) |
|-------|------------------|------------------------|------------------------|
| 1     | 95               | 18                     | 8                      |
| 2     | 105              | 31                     | 7                      |
| 3     | 115              | 51                     | 6                      |
| 4     | 125              | 82                     | 1                      |
| 5     | 135              | 76                     | <1                     |
| 6     | 145              | 73                     | <1                     |
| 7     | 155              | 59                     | <1                     |
| 8     | 165              | 39                     | <1                     |

Reaction condition: **1a** (1.0 mmol),  $\text{Co(OAc)}_2 \cdot 4\text{H}_2\text{O}$  (10 mol %), triphos (10 mol %),  $\text{Sn(OTf)}_2$  (0.3 equiv.), EtOH (2.0 mL),  $\text{CO}_2$  (2.0 MPa),  $\text{H}_2$  (7.0 MPa), 24 h. The yield of products was determined by GC, calibrated using *n*-dodecane as the internal standard.

**Table S7.** The effect of water to the cobalt catalyzed N-methylation reduction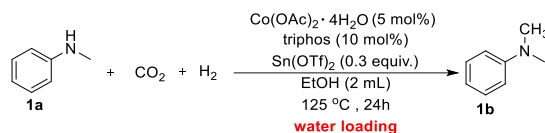

| Entry | Water (equiv.) | Yield of <b>1b</b> (%) |
|-------|----------------|------------------------|
| 1     | 500 mg 4Å      | 16                     |
| 2     | 0              | 82                     |
| 3     | 1              | 80                     |
| 4     | 5              | 70                     |

Reaction condition: **1a** (1.0 mmol),  $\text{Co(OAc)}_2 \cdot 4\text{H}_2\text{O}$  (10 mol %), triphos (10 mol %),  $\text{Sn(OTf)}_2$  (0.3 equiv.), EtOH (2.0 mL),  $\text{CO}_2$  (2.0 MPa),  $\text{H}_2$  (7.0 MPa), 24 h. The yield of products was determined by GC, calibrated using *n*-dodecane as the internal standard.

**Table S8.** The effect of  $\text{Sn(OTf)}_2$  to the cobalt catalyzed N-formamide reduction reaction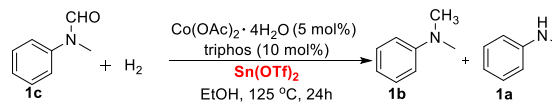

| Entry | $\text{Sn(OTf)}_2$ (equiv.) | Con. (%) | Yield of <b>1b</b> (%) |
|-------|-----------------------------|----------|------------------------|
| 1     | 0                           | 5        | 0.2                    |
| 2     | 0.1                         | 76       | 63                     |
| 3     | 0.3                         | 100      | 72                     |
| 8     | 0.5                         | 100      | 52                     |

Reaction condition: **1c** (1.0 mmol),  $\text{Co(OAc)}_2 \cdot 4\text{H}_2\text{O}$  (10 mol %), triphos (10 mol %),  $\text{Sn(OTf)}_2$ , EtOH (2.0 mL),  $\text{H}_2$  (7.0 MPa), 24 h. The yield of products was determined by GC, calibrated using *n*-dodecane as the internal standard.

**Table S9.** Optimization of ligands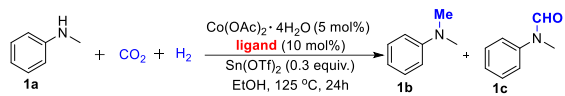

| entry | ligand         | Con. (%) | Yield of <b>1b</b> (%) |
|-------|----------------|----------|------------------------|
| 1     | $\text{PP}_3$  | 0        | 0                      |
| 2     | Xantphos       | 0        | 0                      |
| 3     | $\text{PPh}_3$ | 0        | 0                      |

Reaction condition: **1a** (1.0 mmol), cobalt salt (5 mol %), ligand (10 mol %),  $\text{Sn(OTf)}_2$  (0.3 equiv.), EtOH (2 mL),  $\text{CO}_2$  (2.0 MPa),  $\text{H}_2$  (7.0 MPa), 125 °C, 24 h. The yield of products was determined by GC, calibrated using *n*-dodecane as the internal standard.

### 3. The interaction of $\text{Sn}(\text{OTf})_2$ and N-methyl formanilide.

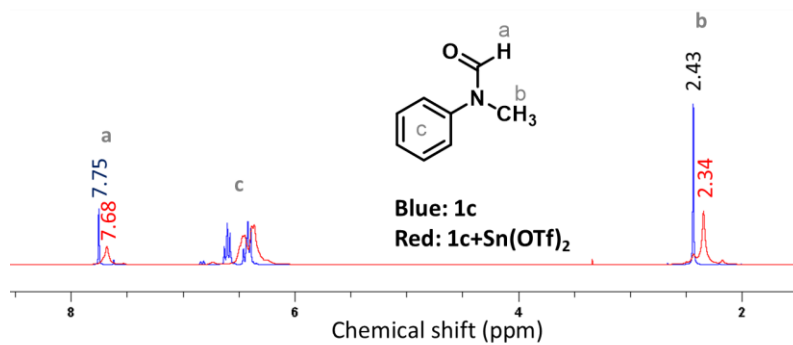

Figure S1.  $^1\text{H}$  NMR spectra of 1c and the mixture of  $\text{Sn}(\text{OTf})_2$  and 1c.

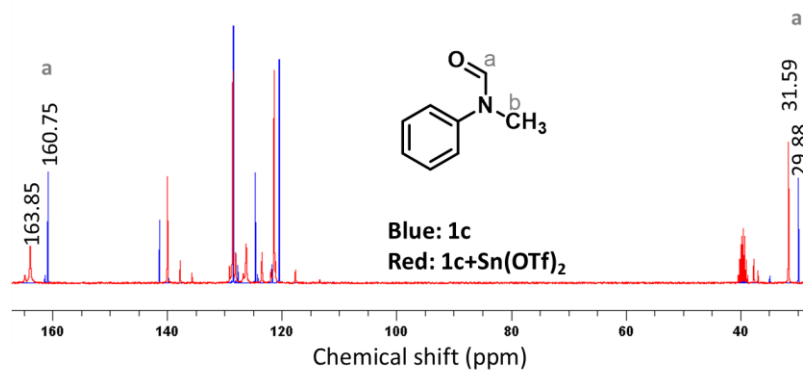

Figure S2.  $^{13}\text{C}$  NMR spectra of 1c and the mixture of  $\text{Sn}(\text{OTf})_2$  and 1c.

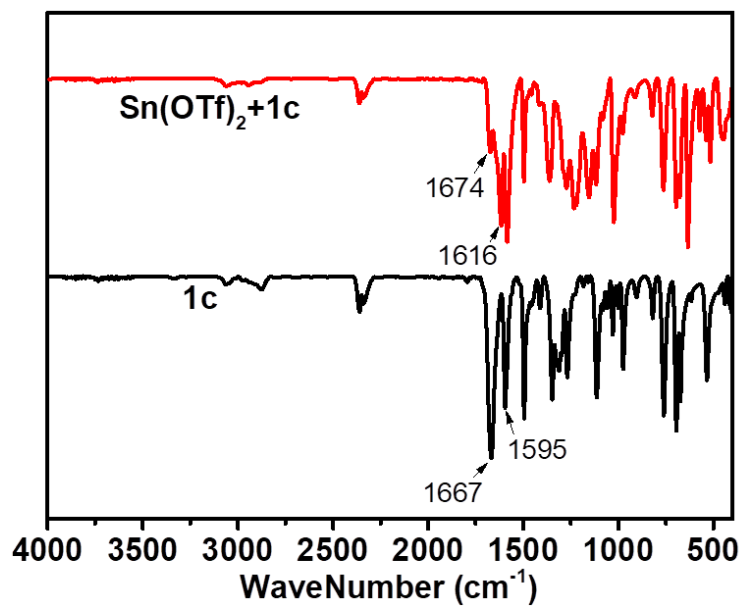

Figure S3. FTIR spectra of 1c and the mixture of Sn(OTf)<sub>2</sub> and 1c.



## 4. Mechanism investigation

### 4.1 $^{13}\text{C}$ isotope experiment of cobalt catalyzed hydrogenation of $\text{CO}_2$

Typical procedures:  $\text{Co}(\text{OAc})_2 \cdot 4\text{H}_2\text{O}$  (0.05 mmol), triphos (0.01 mmol),  $\text{Sn}(\text{OTf})_2$  (0.3 mmol), and EtOH (2 mL) were loaded into a stainless steel autoclave with a Teflon tube (16 mL inner volume) under  $\text{N}_2$  atmosphere. The reactor was charged with  $^{13}\text{CO}_2$  up to 1.0 MPa and then with  $\text{H}_2$  until the total pressure reached 9.0 MPa at room temperature. The autoclave was moved to an oil bath of 125 °C, and magnetically stirred for 24 h. After reaction, the autoclave was cooled down to room temperature, and the reaction product was analyzed by GC, GC-MS and NMR.

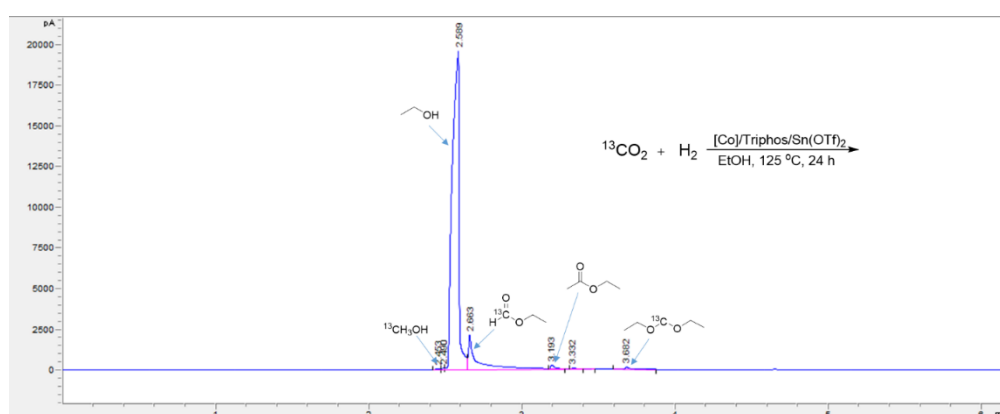

Figure S4. GC spectra of reaction I, Scheme 2.

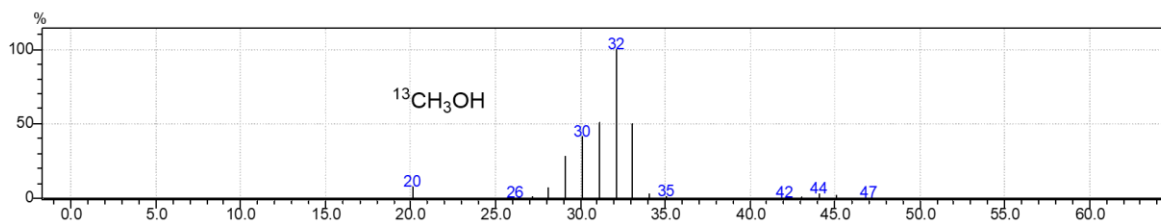

Figure S5. MS spectrum of  $^{13}\text{CH}_3\text{OH}$  in reaction I, Scheme 2.

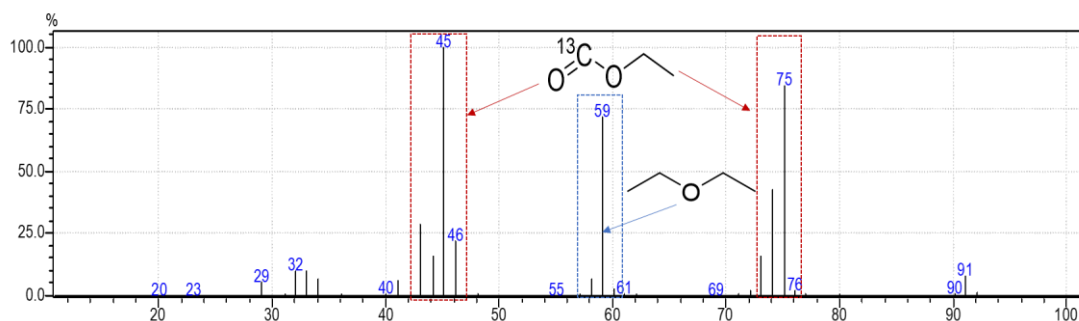

Figure S6. MS spectrum of H<sup>13</sup>COOEt in reaction I, Scheme 2.

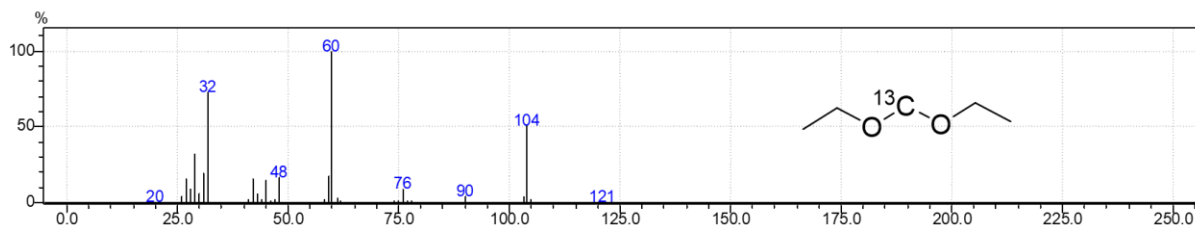

Figure S7. MS spectrum of EtO<sup>13</sup>CH<sub>2</sub>OEt in reaction I, Scheme 2.

## 4.2 Cobalt catalyzed reductive coupling of **1a** with various CO<sub>2</sub> hydrogenation products.

Table S8. Cobalt catalyzed reductive coupling of **1a** with various CO<sub>2</sub> hydrogenation products

| Entry | CO <sub>2</sub> reduction level | Intermediates          | Yield of <b>1b</b> (%) |
|-------|---------------------------------|------------------------|------------------------|
| 1     | 2e reduction                    | HCOOH                  | 53                     |
| 2     | 2e reduction                    | HCOOEt                 | 75                     |
| 3     | 4e reduction                    | EtOCH <sub>2</sub> OEt | 3                      |
| 4     | 4e reduction                    | HCHO                   | 5                      |
| 5     | 6e reduction                    | CH <sub>3</sub> OH     | 2                      |

Reaction conditions: [a] N-methylaniline (1.0 mmol), intermediate (10 mmol), Co(OAc)<sub>2</sub>·4H<sub>2</sub>O (5 mol %), triphos (10 mol %), Sn(OTf)<sub>2</sub> (0.3 equiv.), EtOH (2.0 mL), H<sub>2</sub> (7.0 MPa), 125 °C, 24h.

## 4.3 Cobalt catalyzed N-formamide reduction reaction

Typical procedures: **1c** (1.0 mmol), Co(OAc)<sub>2</sub>·4H<sub>2</sub>O (0.05 mmol), Triphos (0.01 mmol), Sn(OTf)<sub>2</sub> (0.3 mmol), and EtOH (2 mL) were loaded into a stainless steel autoclave with a Teflon tube (16 mL inner volume) under N<sub>2</sub> atmosphere. The reactor was charged with H<sub>2</sub> up to 7.0 MPa at room temperature. The autoclave was moved to an oil bath of 125 °C, and magnetically stirred for 24 h. After reaction, the autoclave was cooled down to room temperature, and the reaction product was analyzed by GC.

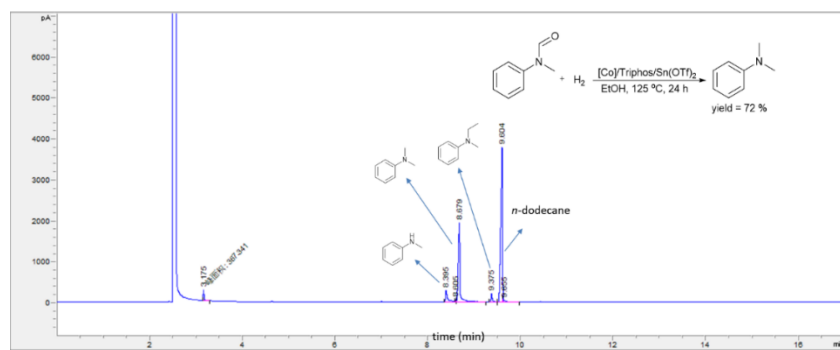

Figure S8. GC spectrum of cobalt catalyzed N-formamide reduction reaction.

#### 4.4 $^{13}\text{C}$ isotope experiment of cobalt catalyzed N-methylation reaction

Typical procedures: **1a** (1.0 mmol),  $\text{Co}(\text{OAc})_2 \cdot 4\text{H}_2\text{O}$  (0.05 mmol), triphos (0.01 mmol),  $\text{Sn}(\text{OTf})_2$  (0.3 mmol), and EtOH (2 mL) were loaded into a stainless steel autoclave with a Teflon tube (16 mL inner volume) under  $\text{N}_2$  atmosphere. The reactor was charged with  $^{13}\text{CO}_2$  up to 1.0 MPa and then with  $\text{H}_2$  until the total pressure reached 9.0 MPa at room temperature. The autoclave was moved to an oil bath of 125 °C, and magnetically stirred for 24 h. After reaction, the autoclave was cooled down to room temperature, and the reaction product was analyzed by GC, GC-MS.

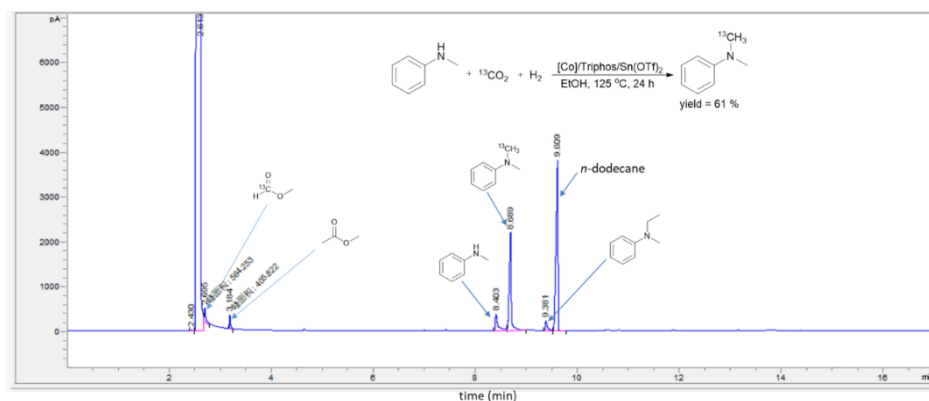

## 5. $^1\text{H}$ and $^{13}\text{C}$ NMR and HR-MS (ESI) data of products

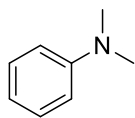

N,N-dimethylaniline.  $^1\text{H}$  NMR (400 MHz, Chloroform-*d*)  $\delta$  7.38 - 7.28 (m, 2H), 6.87 - 6.77 (m, 3H), 3.01 (s, 6H).  $^{13}\text{C}$  NMR (101 MHz,  $\text{CDCl}_3$ )  $\delta$  150.78, 129.16, 116.76, 112.79, 77.48, 77.16, 76.84, 40.69. HR-MS (ESI) calculated for  $\text{C}_8\text{H}_{12}\text{N}$   $[\text{M}+\text{H}]^+$ : 122.0964, found: 122.0965.

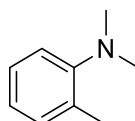

N,N,2-trimethylaniline.  $^1\text{H}$  NMR (400 MHz, Chloroform-*d*)  $\delta$  7.21 (m, 2H), 7.12 - 7.06 (m, 1H), 7.00 (m, 1H), 2.75 (s, 6H), 2.39 (s, 3H).  $^{13}\text{C}$  NMR (101 MHz,  $\text{CDCl}_3$ )  $\delta$  152.87, 132.25, 131.27, 126.55, 122.69, 118.49, 77.48, 77.16, 76.84, 44.35, 18.47. HR-MS (ESI) calculated for  $\text{C}_9\text{H}_{14}\text{N}$   $[\text{M}+\text{H}]^+$ : 136.1121, found: 136.1122.

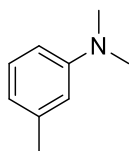

N,N,3-trimethylaniline.  $^1\text{H}$  NMR (400 MHz, Chloroform-*d*)  $\delta$  7.23 - 7.15 (m, 1H), 6.66 - 6.59 (m, 3H), 2.98 (s, 6H), 2.38 (s, 3H).  $^{13}\text{C}$  NMR (101 MHz,  $\text{CDCl}_3$ )  $\delta$  150.91, 138.81, 129.05, 117.81, 113.63, 110.10, 77.48, 77.16, 76.84, 44.79, 40.80, 22.00. HR-MS (ESI) calculated for  $\text{C}_9\text{H}_{14}\text{N}$   $[\text{M}+\text{H}]^+$ : 136.1121, found: 136.1122.

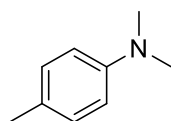

N,N,4-trimethylaniline.  $^1\text{H}$  NMR (400 MHz, Chloroform-*d*)  $\delta$  7.10 (d, 2H), 6.80 - 6.69 (m, 2H), 2.94 (s, 6H), 2.31 (s, 3H).  $^{13}\text{C}$  NMR (101 MHz,  $\text{CDCl}_3$ )  $\delta$  148.97, 129.71, 126.26, 113.38, 77.48, 77.16, 76.84, 41.18, 20.36. HR-MS (ESI) calculated for  $\text{C}_9\text{H}_{14}\text{N}$   $[\text{M}+\text{H}]^+$ : 136.1121, found: 136.1122.

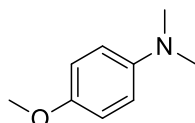

4-methoxy-N,N-dimethylaniline.  $^1\text{H}$  NMR (400 MHz, Chloroform-*d*)  $\delta$  6.87 - 6.80 (m, 2H), 6.79 - 6.70 (m, 2H), 3.75 (s, 3H), 2.85 (s, 6H).  $^{13}\text{C}$  NMR (101 MHz,  $\text{CDCl}_3$ )  $\delta$  152.17, 145.89, 115.04, 114.78, 77.48, 77.16, 76.84, 55.87, 41.93. HR-MS (ESI) calculated for  $\text{C}_9\text{H}_{14}\text{NO}$   $[\text{M}+\text{H}]^+$ : 152.1070, found: 152.1071.

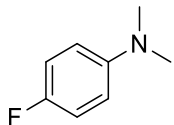

4-fluoro-N,N-dimethylaniline.  $^1\text{H}$  NMR (400 MHz, Chloroform-*d*)  $\delta$  7.03 - 6.87 (m, 2H), 6.70 (m, 2H), 2.91 (s, 6H).  $^{13}\text{C}$  NMR (101 MHz,  $\text{CDCl}_3$ )  $\delta$  155.6 (C-F,  $J_{\text{C-F}} = 236.2$  Hz), 147.7, 115.4 (C-F,  $J_{\text{C-F}} = 22.1$  Hz), 114.0 (C-F,  $J_{\text{C-F}} = 7.4$  Hz), 41.5. HR-MS (ESI) calculated for  $\text{C}_8\text{H}_{11}\text{FN}$   $[\text{M}+\text{H}]^+$ : 140.0870, found: 140.0871.

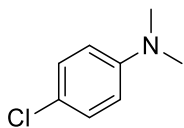

4-chloro-N,N-dimethylaniline.  $^1\text{H}$  NMR (400 MHz, Chloroform-*d*)  $\delta$  7.23 - 7.13 (m, 2H), 6.71 - 6.59 (m, 2H), 2.93 (s, 6H).  $^{13}\text{C}$  NMR (101 MHz,  $\text{CDCl}_3$ )  $\delta$  149.32, 128.94, 121.63, 113.82, 77.48, 77.16, 76.84, 40.80. HR-MS (ESI) calculated for  $\text{C}_8\text{H}_{11}\text{ClN}$   $[\text{M}+\text{H}]^+$ : 156.0575, found: 156.0575.

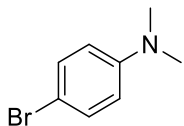

4-bromo-N,N-dimethylaniline.  $^1\text{H}$  NMR (400 MHz, Chloroform-*d*)  $\delta$  7.35 - 7.27 (m, 2H), 6.70 - 6.50 (m, 2H), 2.93 (s, 6H).  $^{13}\text{C}$  NMR (101 MHz,  $\text{CDCl}_3$ )  $\delta$  149.64, 131.81, 114.26, 108.68, 77.48, 77.16, 76.84, 40.68. HR-MS (ESI) calculated for  $\text{C}_8\text{H}_{11}\text{BrN}$   $[\text{M}+\text{H}]^+$ : 200.0069, found: 200.0071.

## 6. $^1\text{H}$ and $^{13}\text{C}$ NMR spectra of products

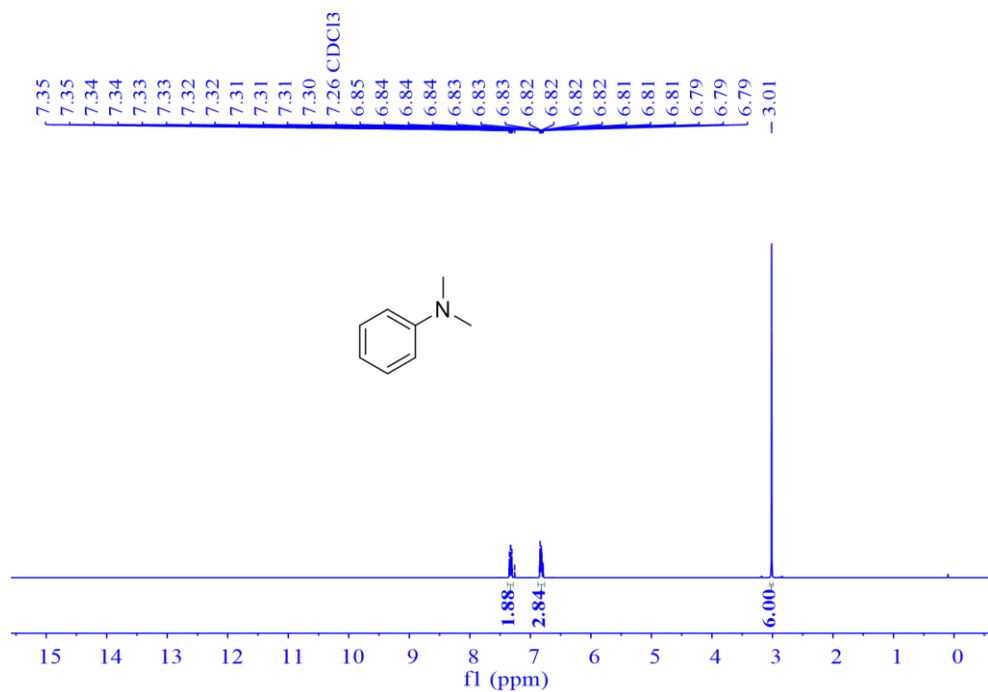

Figure S11.  $^1\text{H}$  NMR of N,N-dimethylaniline at 293.15 K in  $\text{CDCl}_3$  (400 MHz).

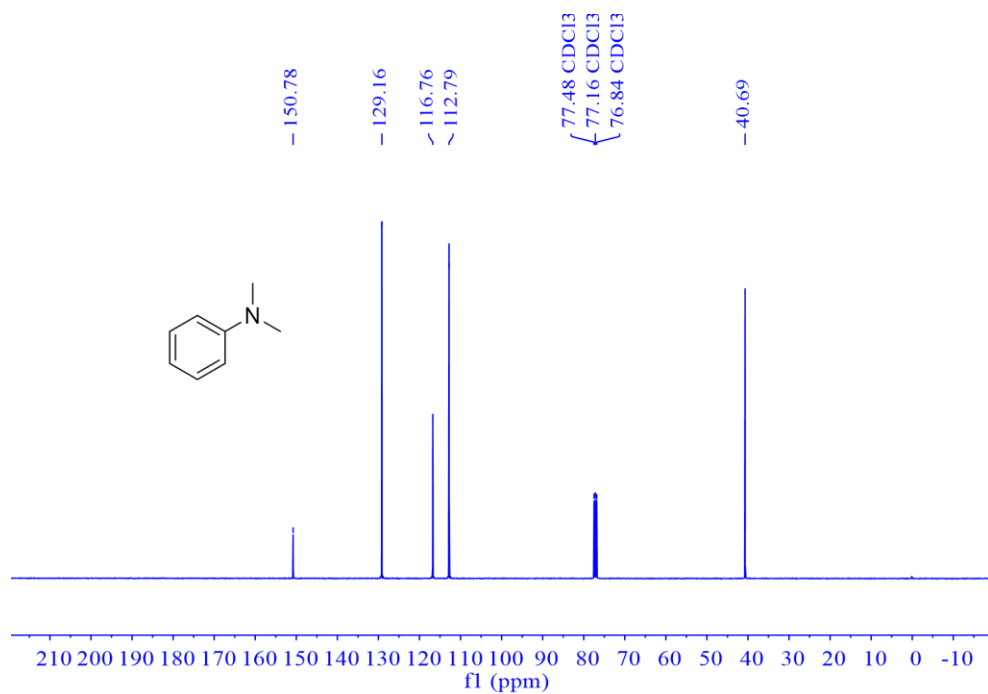

Figure S12.  $^{13}\text{C}$  NMR of N,N-dimethylaniline at 293.15 K in  $\text{CDCl}_3$  (400 MHz).

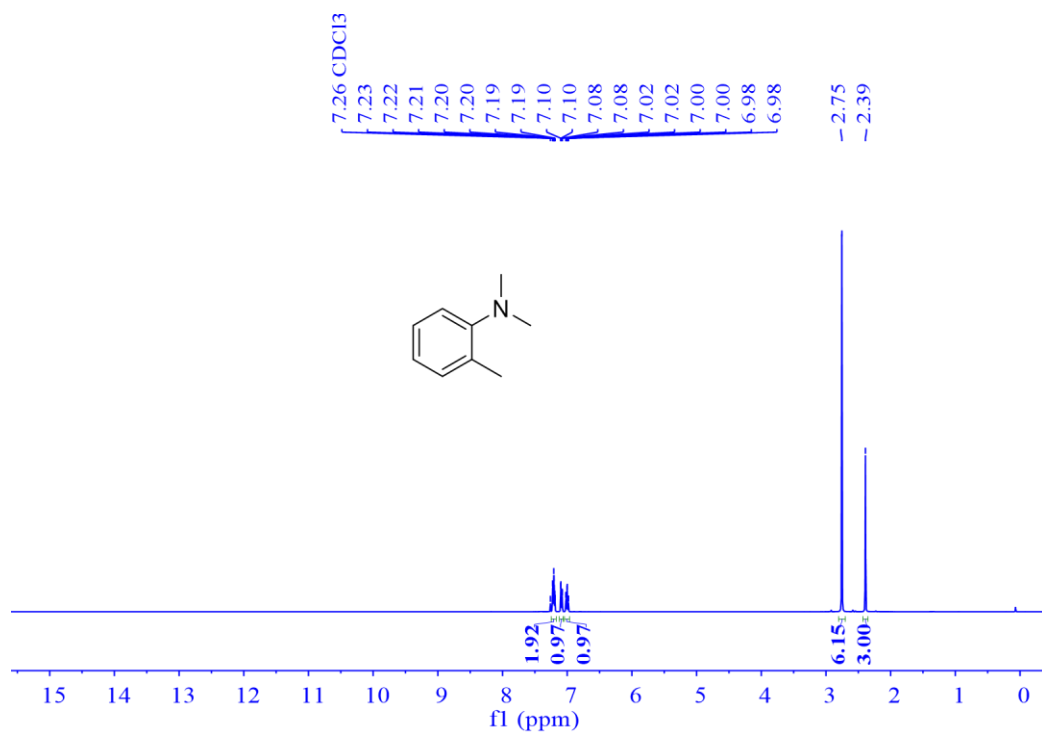

**Figure S13.** <sup>1</sup>H NMR of N,N,2-trimethylaniline at 293.15 K in CDCl<sub>3</sub> (400 MHz).

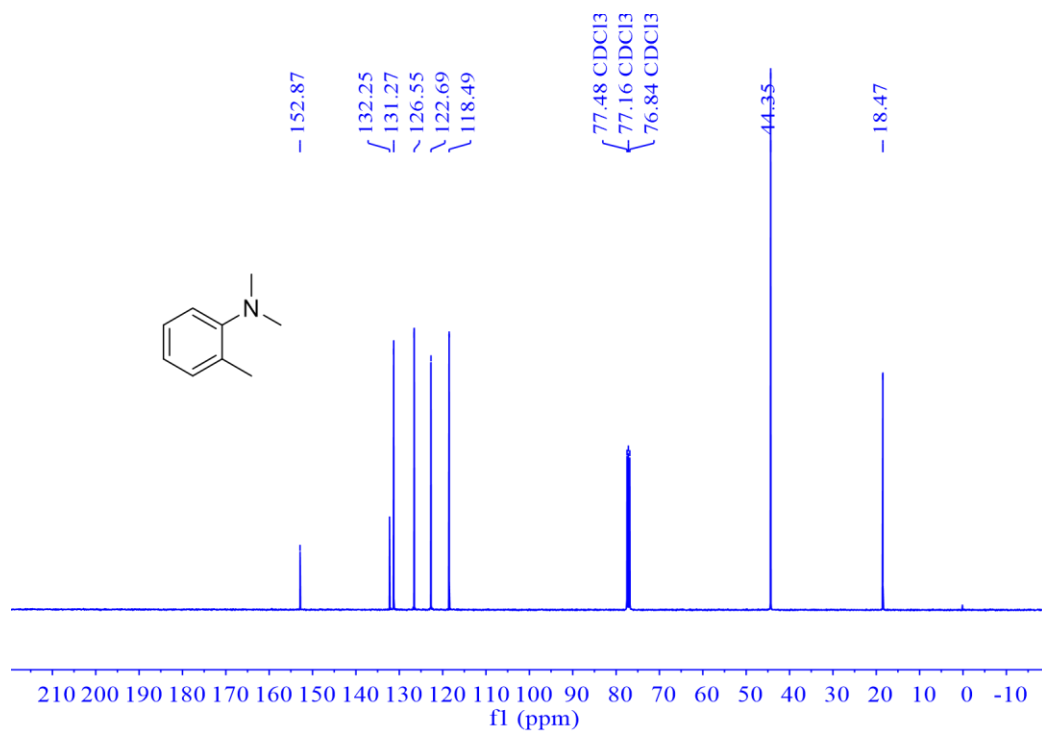

**Figure S14.** <sup>13</sup>C NMR of N,N,2-trimethylaniline at 293.15 K in CDCl<sub>3</sub> (400 MHz).

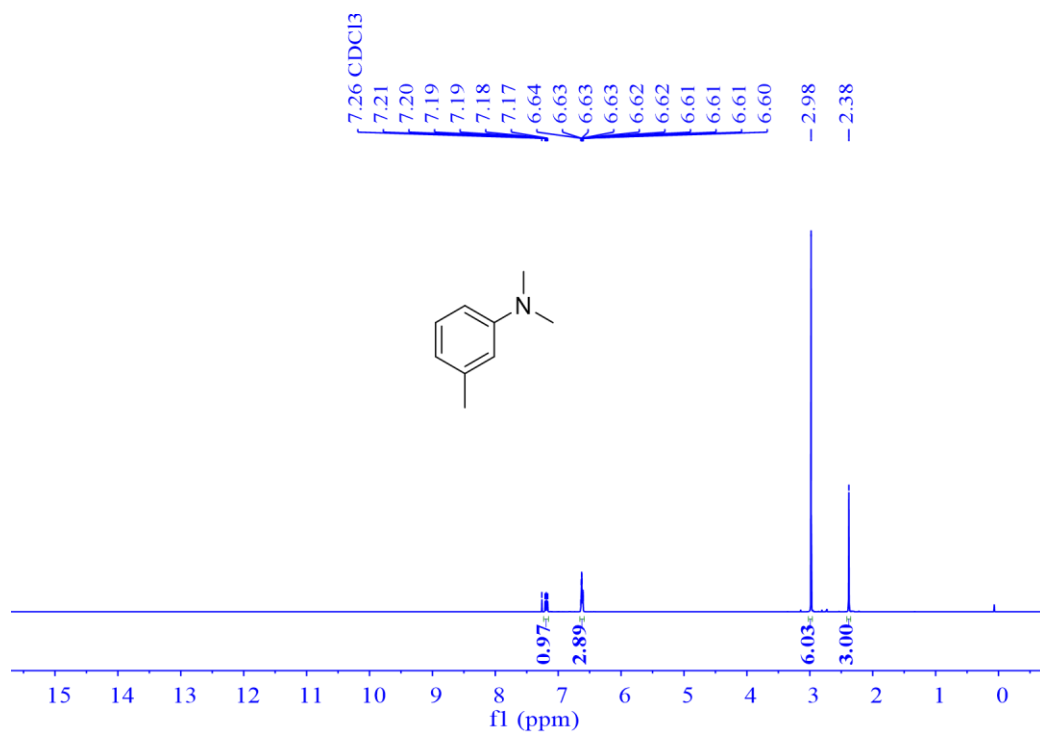

Figure S15. <sup>1</sup>H NMR of N,N,3-trimethylaniline at 293.15 K in CDCl<sub>3</sub> (400 MHz).

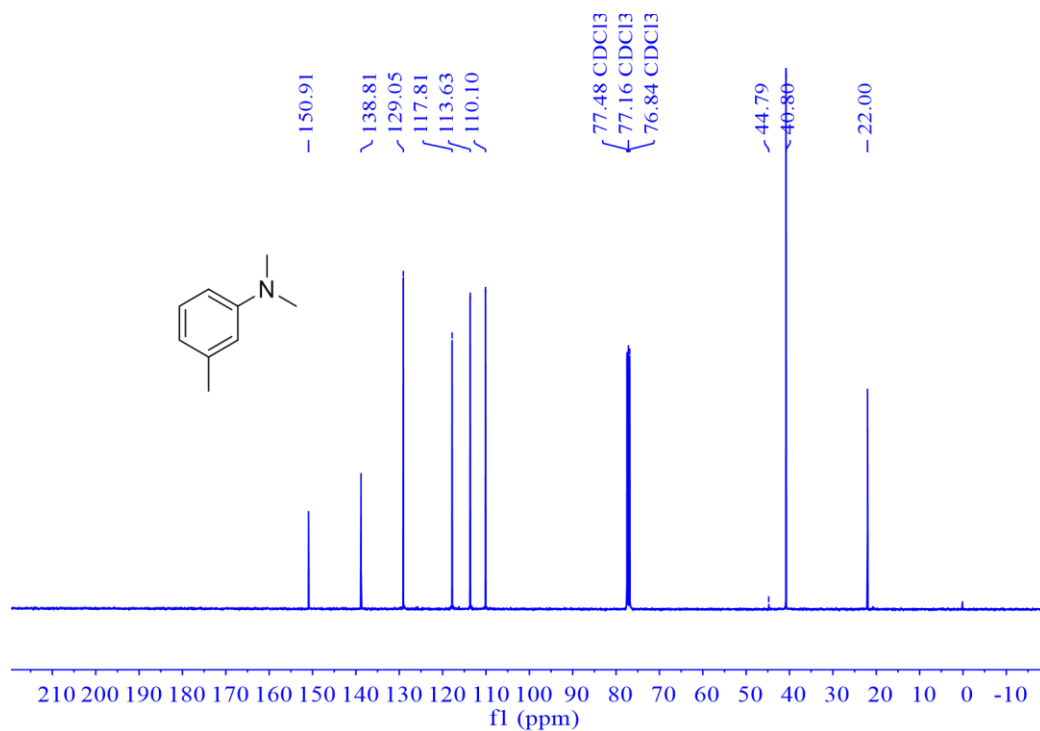

Figure S16. <sup>13</sup>C NMR of N,N,3-trimethylaniline at 293.15 K in CDCl<sub>3</sub> (400 MHz).



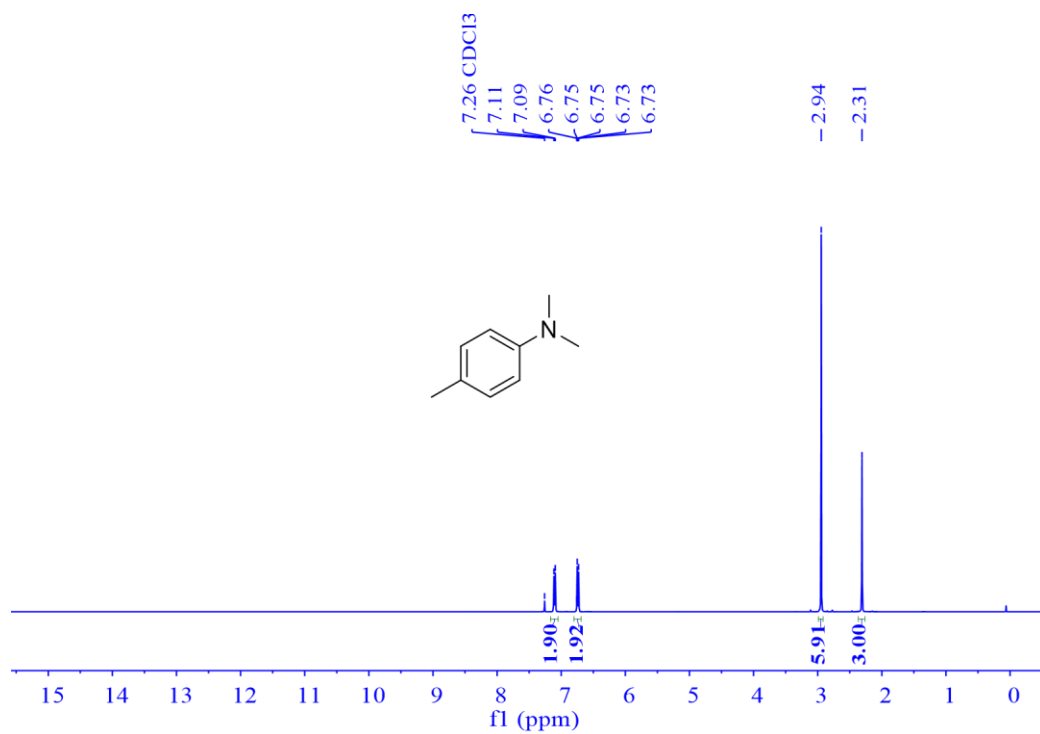

**Figure S17.** <sup>1</sup>H NMR of N,N,4-trimethylaniline at 293.15 K in CDCl<sub>3</sub> (400 MHz).

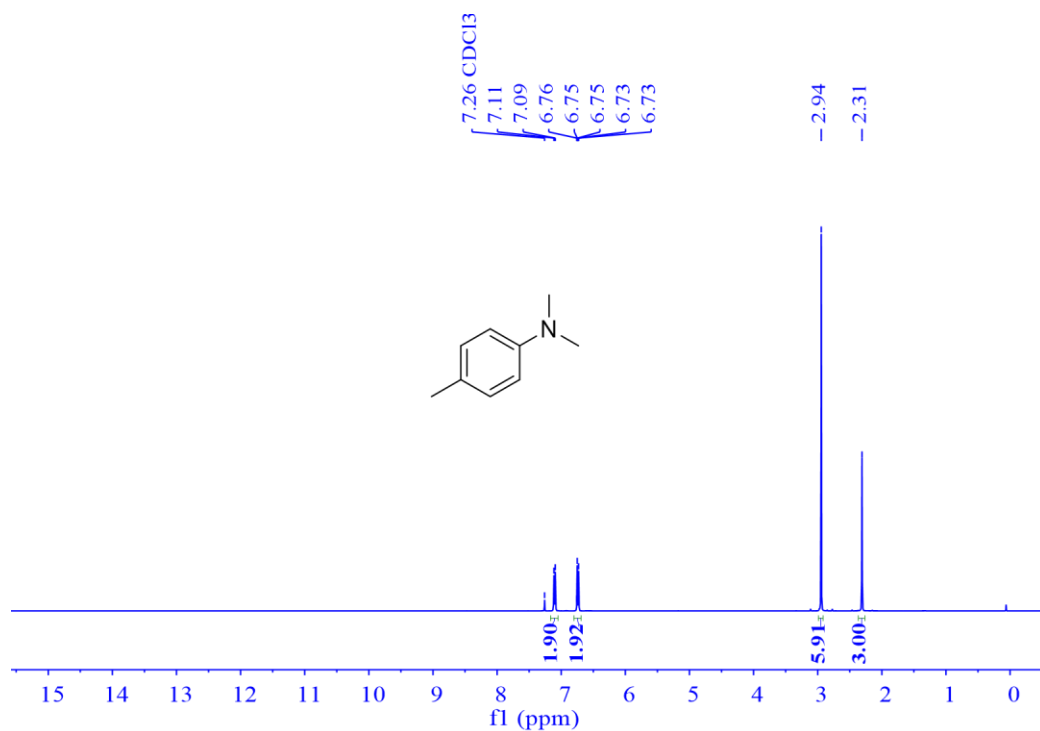

**Figure S18.** <sup>13</sup>C NMR of N,N,4-trimethylaniline at 293.15 K in CDCl<sub>3</sub> (400 MHz).

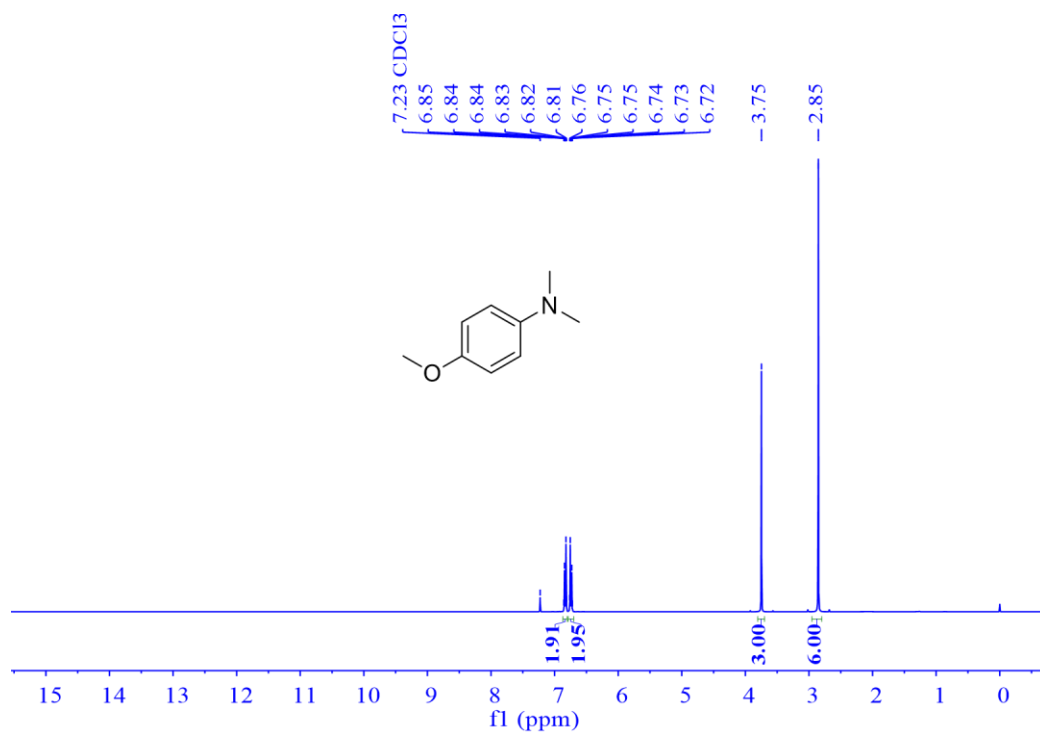

**Figure S19.**  $^1\text{H}$  NMR of 4-methoxy-N,N-dimethylaniline at 293.15 K in  $\text{CDCl}_3$  (400 MHz).

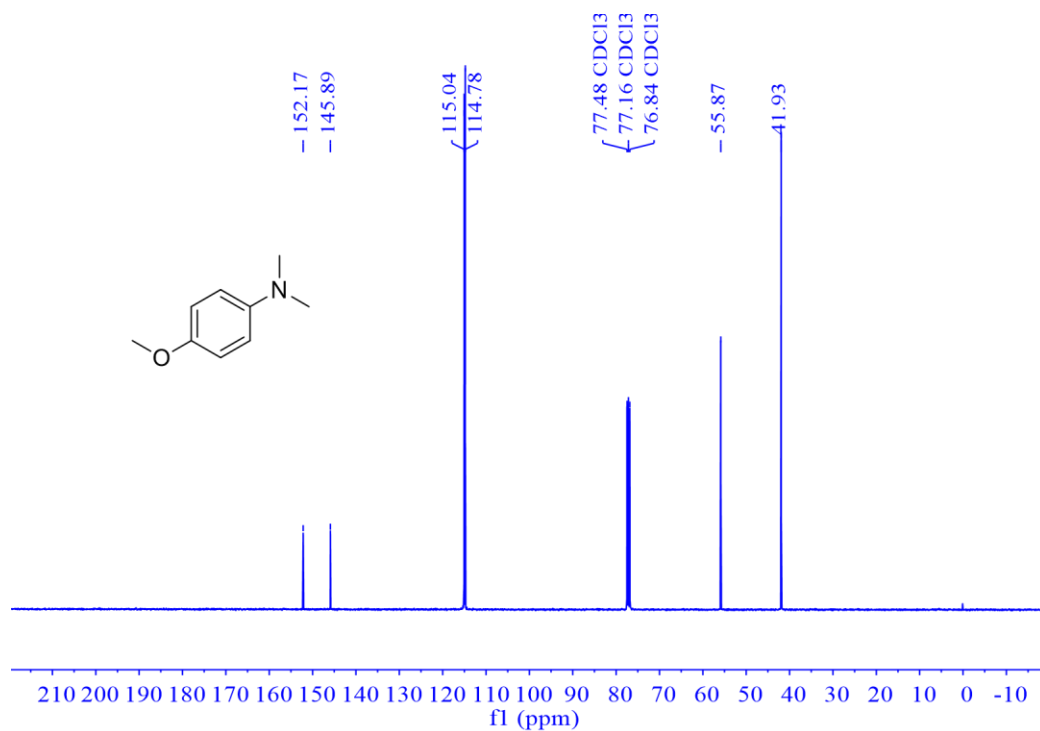

**Figure S20.**  $^{13}\text{C}$  NMR of 4-methoxy-N,N-dimethylaniline at 293.15 K in  $\text{CDCl}_3$  (400 MHz).

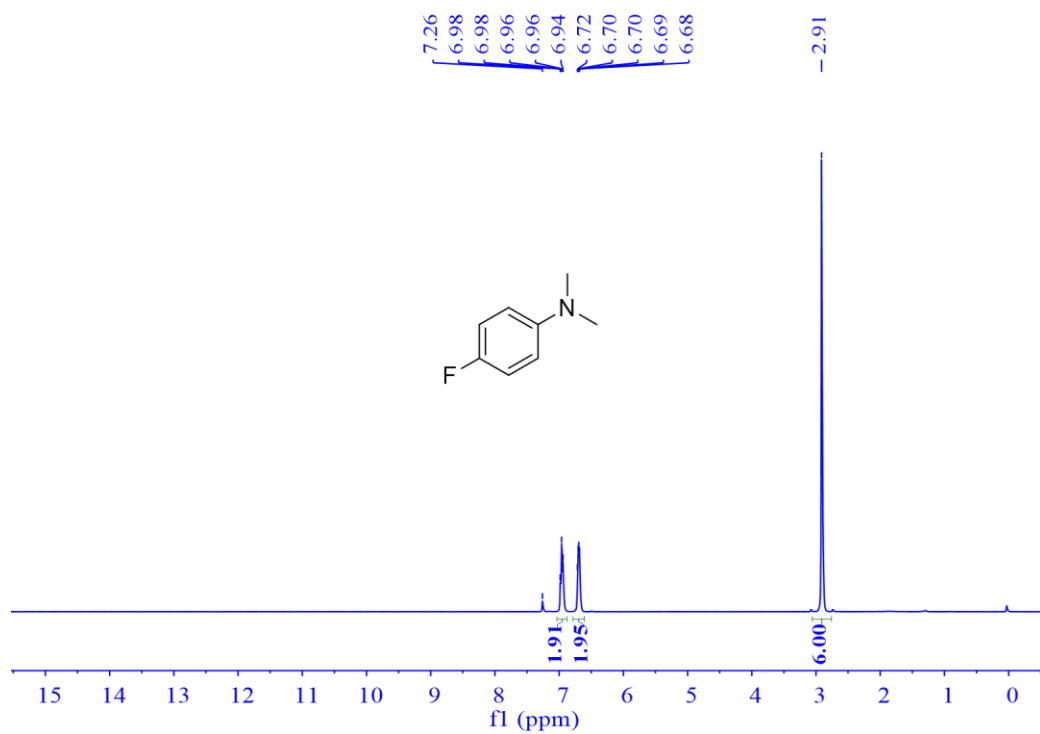

**Figure S21.** <sup>1</sup>H NMR of 4-fluoro-N,N-dimethylaniline at 293.15 K in CDCl<sub>3</sub> (400 MHz).

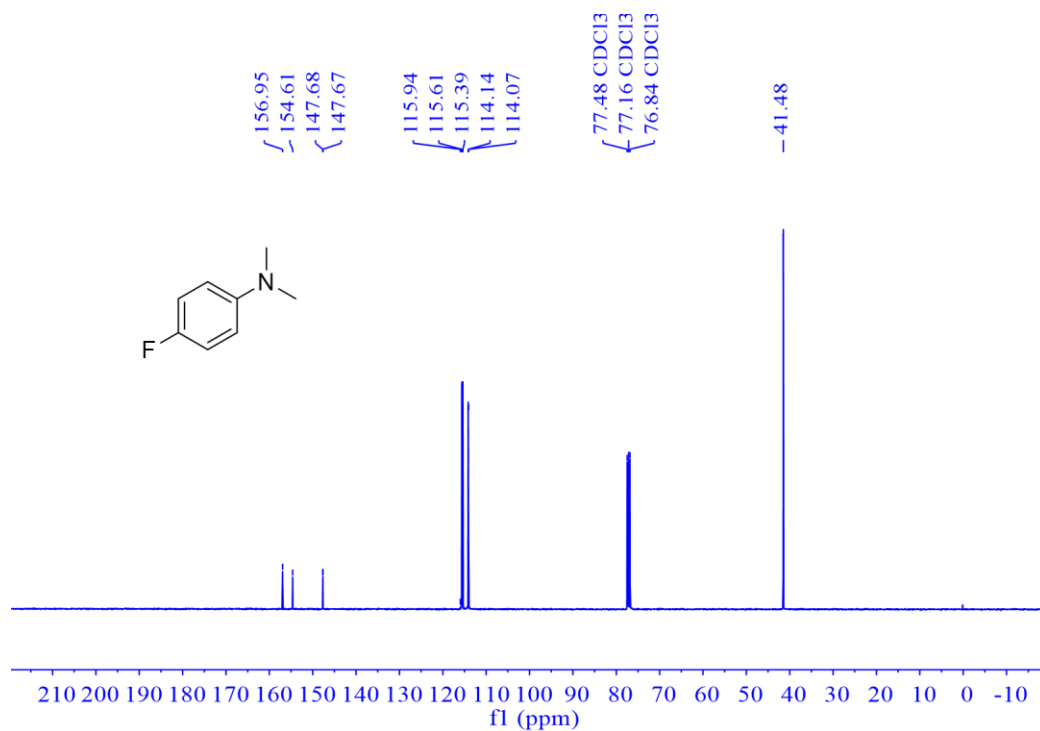

**Figure S22.** <sup>13</sup>C NMR of 4-fluoro-N,N-dimethylaniline at 293.15 K in CDCl<sub>3</sub> (400 MHz).

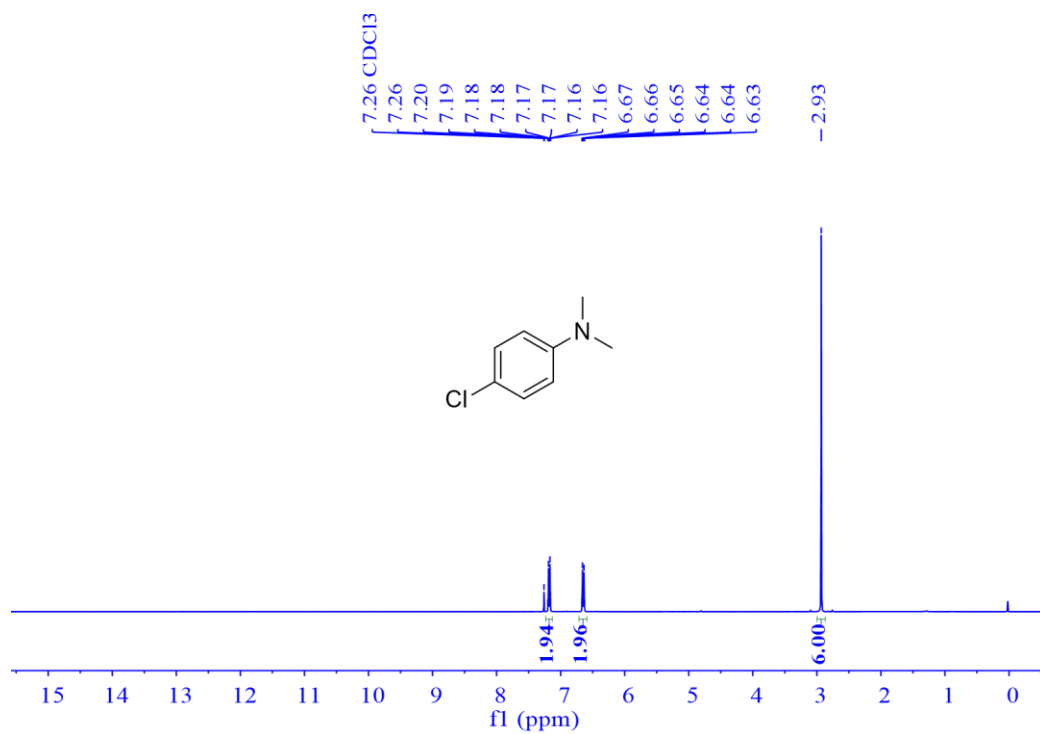

**Figure S23.** <sup>1</sup>H NMR of 4-chloro-N,N-dimethylaniline at 293.15 K in CDCl<sub>3</sub> (400 MHz).

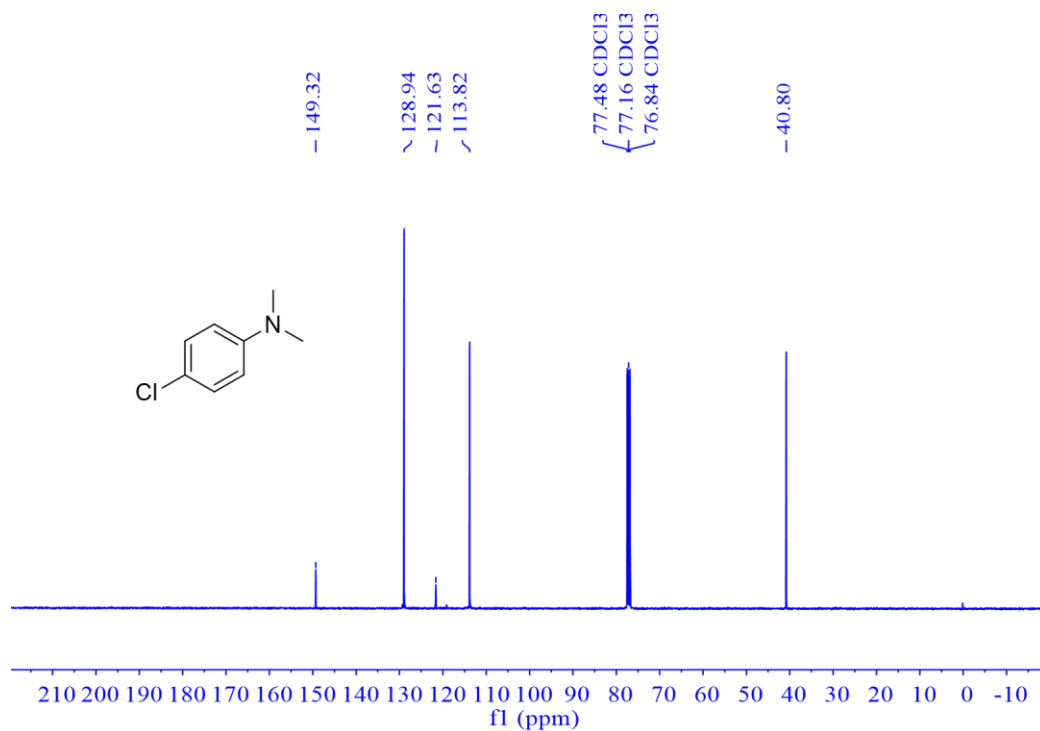

**Figure S24.** <sup>13</sup>C NMR of 4-chloro-N,N-dimethylaniline at 293.15 K in CDCl<sub>3</sub> (400 MHz).

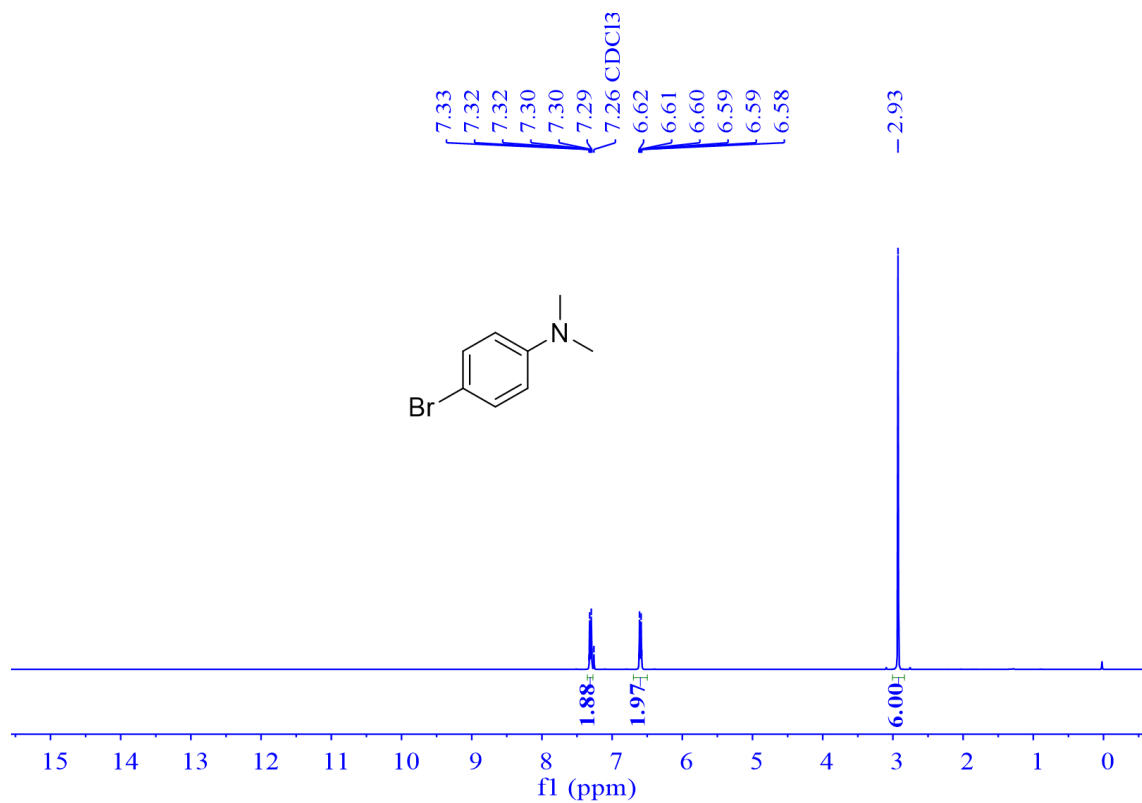

Figure S25. <sup>1</sup>H NMR of 4-bromo-N,N-dimethylaniline at 293.15 K in CDCl<sub>3</sub> (400 MHz).

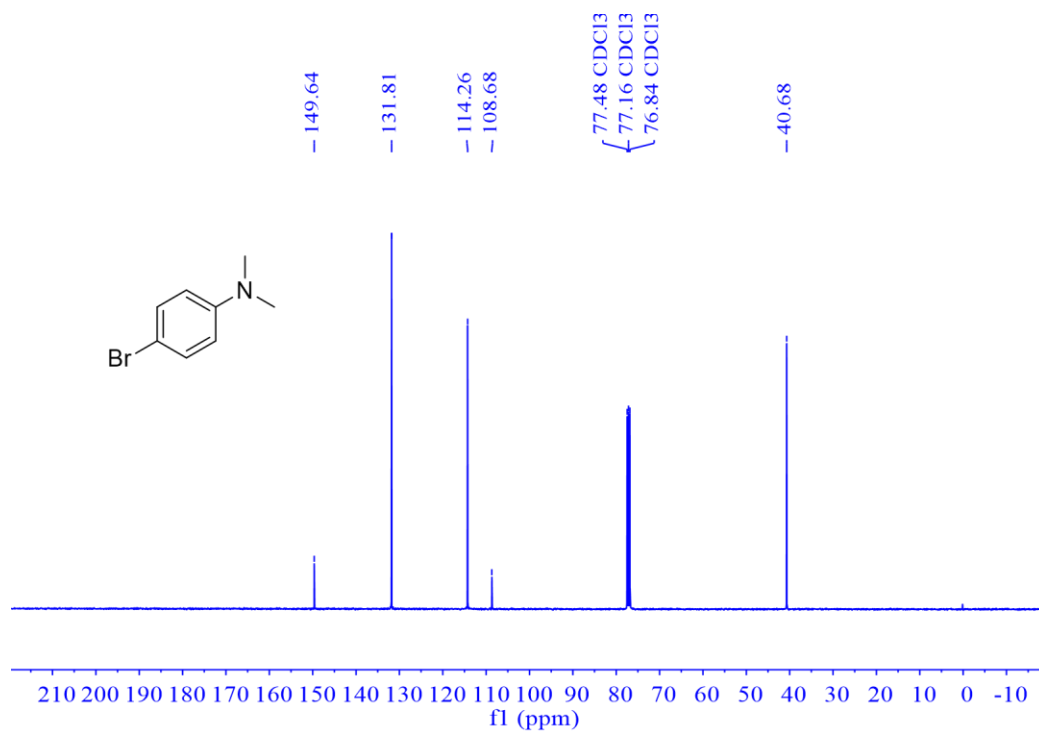

Figure S26. <sup>13</sup>C NMR of 4-bromo-N,N-dimethylaniline at 293.15 K in CDCl<sub>3</sub> (400 MHz).

## 7. GC-MS spectra of products

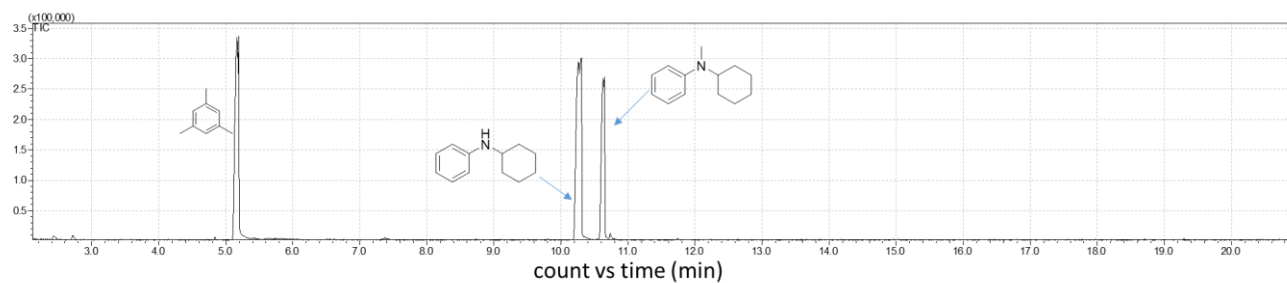

**Figure S27.** N-methylation of 4-aminothioanisole with  $\text{CO}_2/\text{H}_2$  over  $\text{Co}(\text{OAc})_2 \cdot 4\text{H}_2\text{O}/\text{triphos}/\text{Sn}(\text{OTf})_2$

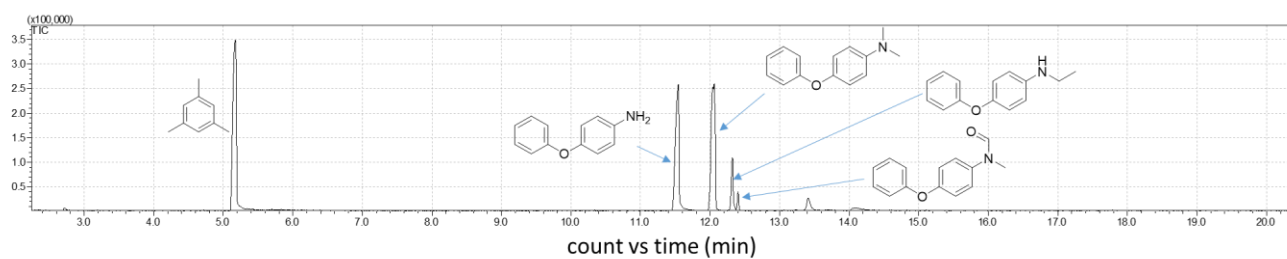

**Figure S28.** N-methylation of 4-phenoxyaniline with  $\text{CO}_2/\text{H}_2$  over  $\text{Co}(\text{OAc})_2 \cdot 4\text{H}_2\text{O}/\text{triphos}/\text{Sn}(\text{OTf})_2$

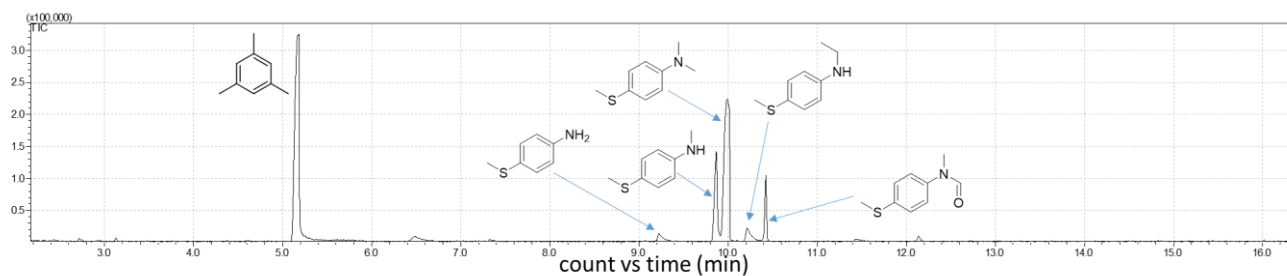

**Figure S29.** N-methylation of 4-aminothioanisole with  $\text{CO}_2/\text{H}_2$  over  $\text{Co}(\text{OAc})_2 \cdot 4\text{H}_2\text{O}/\text{triphos}/\text{Sn}(\text{OTf})_2$

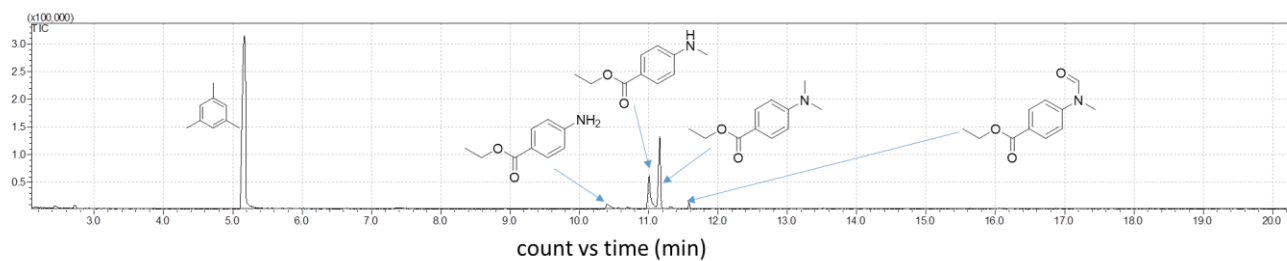

**Figure S30.** N-methylation of benzocaine with  $\text{CO}_2/\text{H}_2$  over  $\text{Co}(\text{OAc})_2 \cdot 4\text{H}_2\text{O}/\text{triphos}/\text{Sn}(\text{OTf})_2$

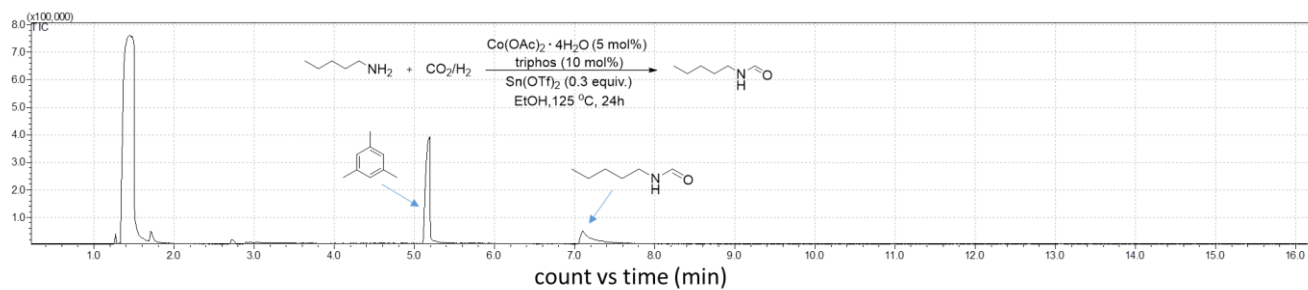

**Figure S31.** N-formylation of *n*-amyamine with  $\text{CO}_2/\text{H}_2$  over  $\text{Co}(\text{OAc})_2 \cdot 4\text{H}_2\text{O}$ /triphos/ $\text{Sn}(\text{OTf})_2$

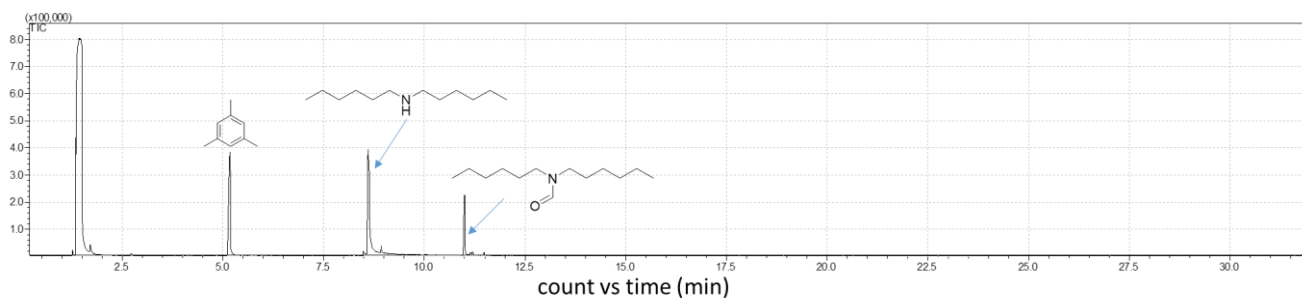

**Figure S32.** N-formylation of *n*-hexyl-1-hexanamine with  $\text{CO}_2/\text{H}_2$  over  $\text{Co}(\text{OAc})_2 \cdot 4\text{H}_2\text{O}$ /triphos/ $\text{Sn}(\text{OTf})_2$

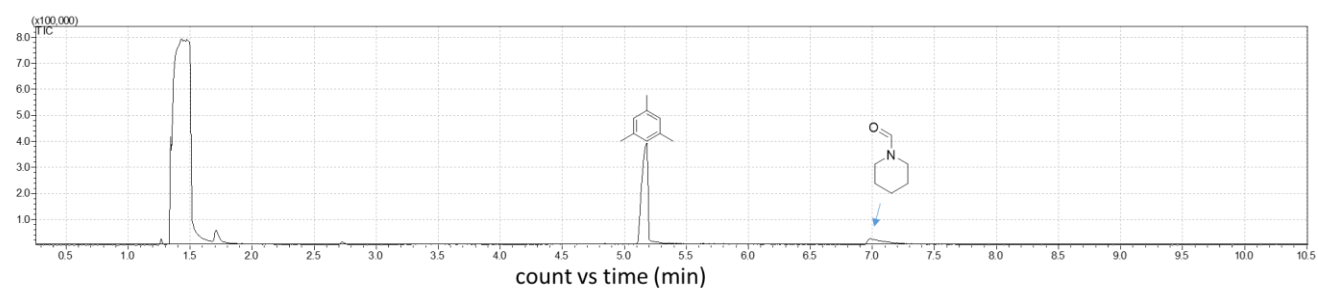

**Figure S33.** N-formylation of piperidine with  $\text{CO}_2/\text{H}_2$  over  $\text{Co}(\text{OAc})_2 \cdot 4\text{H}_2\text{O}$ /triphos/ $\text{Sn}(\text{OTf})_2$

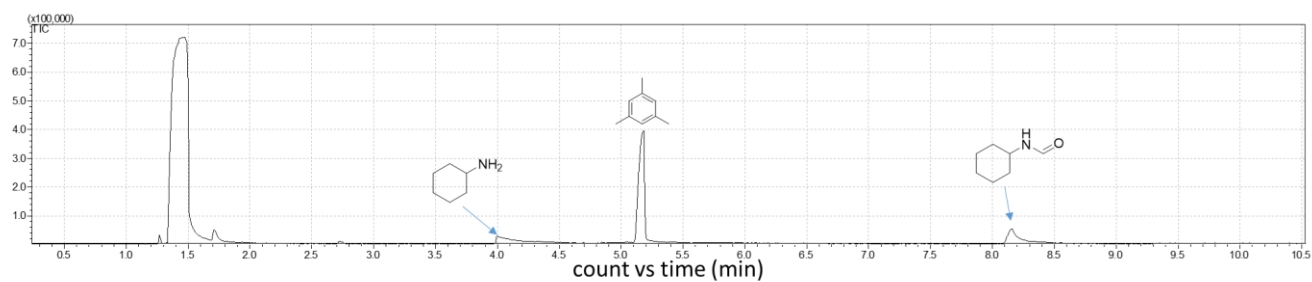

**Figure S34.** N-formylation of cyclohexylamine with  $\text{CO}_2/\text{H}_2$  over  $\text{Co}(\text{OAc})_2 \cdot 4\text{H}_2\text{O}$ /triphos/ $\text{Sn}(\text{OTf})_2$

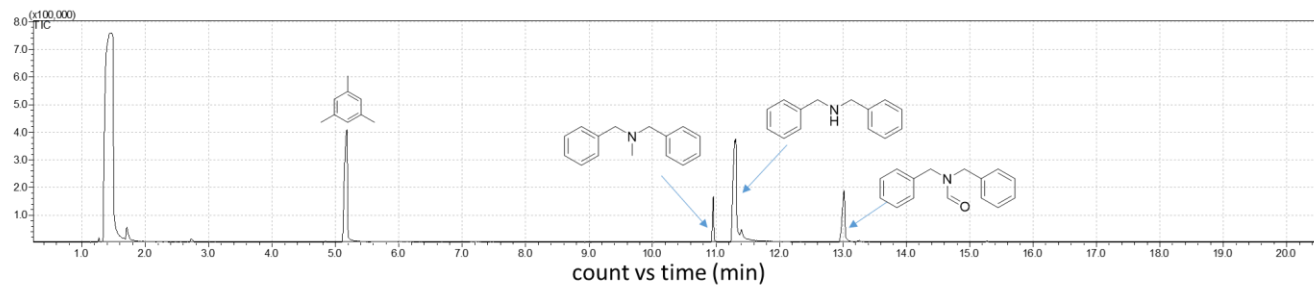

**Figure S35.** N-formylation of dibenzylamine with  $\text{CO}_2/\text{H}_2$  over  $\text{Co}(\text{OAc})_2 \cdot 4\text{H}_2\text{O}/\text{triphos}/\text{Sn}(\text{OTf})_2$



## 8. References

- [1] K. Beydoun, T. vom Stein, J. Klankermayer, W. Leitner, *Angew. Chem. Int. Ed.* **2013**, *52*, 9554-9557.
- [2] Y. Li, I. Sorribes, T. Yan, K. Junge, M. Beller, *Angew. Chem. Int. Ed.* **2013**, *52*, 12156-12160.
- [3] X. Cui, Y. Zhang, Y. Deng, F. Shi, *Chem. Commun.* **2014**, *50*, 13521-13524.
- [4] K. Kon, S. M. A. H. Siddiki, W. Onodera, K.-i. Shimizu, *Chem. Eur. J.* **2014**, *20*, 6264-6267.
- [5] X. J. Cui, X. C. Dai, Y. Zhang, Y. Q. Deng, F. Shi, *Chem. Sci.* **2014**, *5*, 649-655.
- [6] X.-L. Du, G. Tang, H.-L. Bao, Z. Jiang, X.-H. Zhong, D. S. Su, J.-Q. Wang, *ChemSusChem* **2015**, *8*, 3489-3496.
- [7] T. Toyao, S. M. A. H. Siddiki, Y. Morita, T. Kamachi, A. S. Touchy, W. Onodera, K. Kon, S. Furukawa, H. Ariga, K. Asakura, K. Yoshizawa, K. i. Shimizu, *Chem. Eur. J.* **2017**, *23*, 14848-14859.
- [8] M. Tamura, A. Miura, Y. Gu, Y. Nakagawa, K. Tomishige, *Chem. Lett.* **2017**, *46*, 1243-1246.
- [9] W. Lin, H. Cheng, Q. Wu, C. Zhang, M. Arai, F. Zhao, *ACS Catal.* **2020**, *10*, 3285-3296.
